# Supplementary material for: A fluorescent aptasensor based on berberine for ultrasensitive detection of bisphenol A in tap water
Source: Royal Society of Chemistry journal article supplement (doi:10.1039/d1ay00180a), 2021-01-01
Supplement: d1ay00180a1.pdf [file d1ay00180a1.pdf]

## Electronic Supplementary Information

### A fluorescent aptasensor based on berberine for ultrasensitive detection of bisphenol A in tap water

Yuxin Wei, Yangyang Zhou, Yanli Wei\*, Chuan Dong, Li Wang\*

Institute of Environmental Science, Shanxi University, Taiyuan 030006, P. R. China.

Correspondence: E-mail: weiyanni@sxu.edu.cn (Y. Wei); wangli@sxu.edu.cn (L. Wang). Tel/Fax: +863517011011

| 生工 Sangon Biotech                                                                                                                |                                                                                | DNA合成报告单       |            |
|----------------------------------------------------------------------------------------------------------------------------------|--------------------------------------------------------------------------------|----------------|------------|
| Order No:                                                                                                                        | 111747970                                                                      | Lot No:        | 1924826224 |
| Primer Name:                                                                                                                     | BPA-1                                                                          |                |            |
| Sequence(5'to3')                                                                                                                 | Tgg TCg TTg gTC gTT CgC gTT TCT ggA TTT TTT ATT TCT ggg gTT CAg TTC TTT TTT gT |                |            |
| Date:                                                                                                                            | 2021-03-01                                                                     | Primer Length: | 59         |
| Tm:                                                                                                                              | 69.12                                                                          | MW(ug/mole):   | 18192.76   |
| OD's:                                                                                                                            | 4.0                                                                            | %GC:           | 40.68      |
| ug per OD:                                                                                                                       | 34.61                                                                          | ug's:          | 138.45     |
| nmoles per OD:                                                                                                                   | 1.90                                                                           | nmoles:        | 7.6        |
| Purification:                                                                                                                    | ULTRAPAGE                                                                      | Package:       | 4.0OD x 1  |
| Modification:                                                                                                                    |                                                                                |                |            |
| Modification MW:                                                                                                                 | 0.00                                                                           | Aggregate MW:  | 18192.76   |
| Note: To make 100uM stock solution, add 76 ul buffer or 19 ul of buffer/OD                                                       |                                                                                |                |            |
| 注意:<br>本报告单中碱基序列如与您提供的订单不符合请立即与我们联系<br>如客户未注明OD量, 本公司将按20D合成(长度为10D)<br>如未注明纯化方式, 将按照HAP方法纯化(<40mer)<br>使用前请参看背面使用说明, 感谢您使用我们的产品 |                                                                                |                |            |

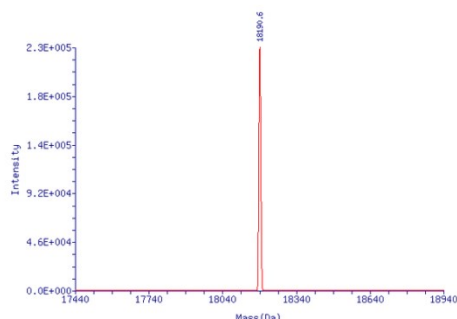

检验结论: DNA序列正确 纯度合格 检验员: 05

| 生工 Sangon Biotech                                                                                                                |                                                                                 | DNA合成报告单       |            |
|----------------------------------------------------------------------------------------------------------------------------------|---------------------------------------------------------------------------------|----------------|------------|
| Order No:                                                                                                                        | 111747970                                                                       | Lot No:        | 1924826225 |
| Primer Name:                                                                                                                     | BPA-2                                                                           |                |            |
| Sequence(5'to3')                                                                                                                 | CCg gTg ggt CAg gTg gga TAg CgT TCC gCg TAT ggc CCA gCg CAT CAg ggg TTC gCA CCA |                |            |
| Date:                                                                                                                            | 2021-03-01                                                                      | Primer Length: | 60         |
| Tm:                                                                                                                              | 83.19                                                                           | MW(ug/mole):   | 18550.99   |
| OD's:                                                                                                                            | 4.0                                                                             | %GC:           | 66.67      |
| ug per OD:                                                                                                                       | 33.03                                                                           | ug's:          | 132.11     |
| nmoles per OD:                                                                                                                   | 1.78                                                                            | nmoles:        | 7.1        |
| Purification:                                                                                                                    | ULTRAPAGE                                                                       | Package:       | 4.0OD x 1  |
| Modification:                                                                                                                    |                                                                                 |                |            |
| Modification MW:                                                                                                                 | 0.00                                                                            | Aggregate MW:  | 18550.99   |
| Note: To make 100uM stock solution, add 71 ul buffer or 18 ul of buffer/OD                                                       |                                                                                 |                |            |
| 注意:<br>本报告单中碱基序列如与您提供的订单不符合请立即与我们联系<br>如客户未注明OD量, 本公司将按20D合成(长度为10D)<br>如未注明纯化方式, 将按照HAP方法纯化(<40mer)<br>使用前请参看背面使用说明, 感谢您使用我们的产品 |                                                                                 |                |            |

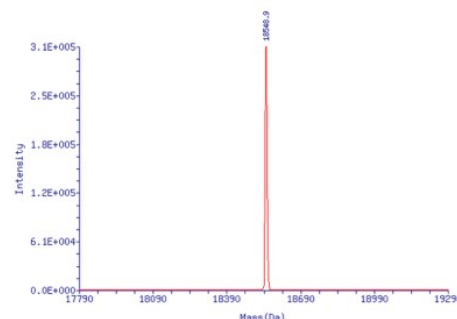

检验结论: DNA序列正确 纯度合格 检验员: 05

Figure S1 The mass spectra of (left) BPA-aptamer<sub>1</sub> and (right) BPA-aptamer<sub>2</sub>.
